# Supplementary material for: Topic-Early Diagnosis and Standard Operating Procedures in Pediatric Ophthalmology: Enhancing Visual Outcomes through Structured Care
Source: Research Square preprint supplement (doi:10.21203/rs.3.rs-7043069/v1), 2025-07-31
Supplement: Supplementary file 1 [file 5f0de517c2b0c0f5a1409092.docx]

**Identification of studies via databases and registers**

Records removed *before screening*:

Duplicate records removed (n =35)

Records marked as ineligible by automation tools (n = 43)

Records removed for other reasons (n = 39)

Records identified from*:

Databases (n = 782)

Additional (n= 45)

**Identification**

Records screened

(n =710 )

Records excluded**

(n =620 )

Reports sought for retrieval

(n =90 )

Reports not retrieved

(n = 0)

**Screening**

Reports assessed for eligibility

(n = 90)

Reports excluded:

Reason 1 (n =10 )

Reason 2 (n = 15)

Reason 3 (n =10 )

etc.

Studies included in review

(n =55 )

Reports of included studies

(n = 6)

**Included**

*Figure depicting the methodology of the research*

*Consider, if feasible to do so, reporting the number of records identified from each database or register searched (rather than the total number across all databases/registers).

**If automation tools were used, indicate how many records were excluded by a human and how many were excluded by automation tools.

Source: Page MJ, et al. BMJ 2021;372:n71. doi: 10.1136/bmj.n71.

This work is licensed under CC BY 4.0. To view a copy of this license, visit <https://creativecommons.org/licenses/by/4.0/>
